# Supplementary material
Source: Springer Nature journal article supplement (https://www.springermedizin.de/resource/supplementary/13052_2013_551_MOESM6_ESM.pdf/9672024)

2 years

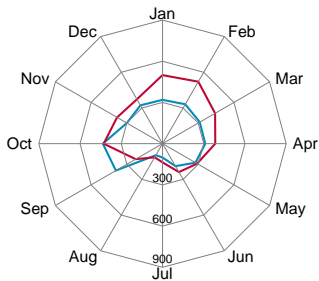

3-4 years

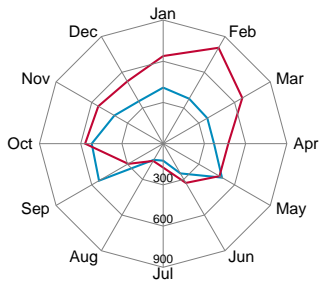

5-9 years

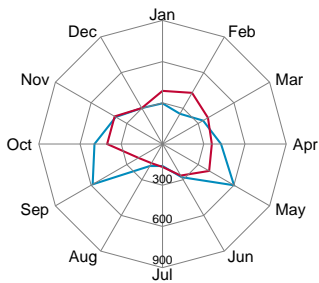

10-17 years

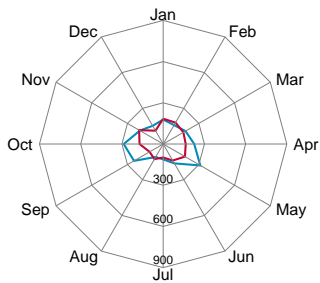

Supplement: MOESM6 [file 9672024]
